# Supplementary material
Source: publisher figshare collection journal article supplement (https://acs.figshare.com/ndownloader/files/4392532)
Supplement: Supplementary file 1 [file 4392532]

## Supplementary Material

### Methodological considerations

The results generated by the automatic Pic/Greg gel image analysis software package (Fraunhofer Gesellschaft, Sankt Augustin, <http://www.fit.fraunhofer.de/projekte/greg/index-en.xml>) were treated in the following way: Protein spots were included if spot volume was at least 1.e10 (in units used by Greg) and background intensity was at least four times less than spot intensity. All spots were checked manually using the Pic program and accepted or rejected depending on their actual appearance. In this way, artifacts were sorted out. For the differential analysis of, e.g., substance treated vs. control proteome, differences in spot intensities were computed. Using a t-test, the probabilities of beta error, generally known as P-values, are computed. If there is good evidence from the gel images that one of the spot intensities is an outlier, e.g., stripes or other distortions occur or the spot is not properly covered by the segmentation, then this one spot's intensity from the respective gel image may be discarded. If a spot is not detected on one image its intensity is set to zero for that image unless it can clearly be identified as an outlier, in which case it is discarded. In general, a spot is selected for further analysis if its p-value is  $\leq 0.01$ , and the abundance ratio of the compared spot intensities is  $>1.5$  or  $<0.667$ . At that point the image quality is checked to assure that the spot was consistently detected on all images. In this way, for each comparison of a toxicant vs. its appropriate solute control, a list of differential spots along with their corresponding abundance ratios is obtained. For the subsequent cluster analysis, the union of all protein spots/abundance ratios that had been found differential for any of the probed substances was used.

The question arises if the differential spots identified represent specific markers of embryotoxicity or are simply more abundant than other proteins. With the applied proteomic technique, typically some thousand protein spots per gel are detected covering spot volumes of more than three orders of magnitude. From these, normally the vast majority is found to be not differentially affected and only between 10 and 100 differentials are identified. Their absolute sizes may cover a wide range of spot

volumes, but rarely the most abundant protein spots are among these differentials. Thus, the applied technique definitely does not only detect the more abundant proteins. What can be said about specificity so far is that there is a marked coincidence of the observed volume changes in many of these spots for all substances from one and the same cluster. So, yes there is specificity of the current observations. Nonetheless, the authors are well aware of the fact that it is not entirely clear yet what the observed changes in biomarker abundance are actually specific for. More research is needed to identify a (small) set of biomarkers that can be used to reliably predict different types of embryotoxicity of an unknown potential toxicant.

In a recent publication, concerns have been raised regarding the predictive power of cluster analyses in gene expression studies (59). This article criticizes “a spurious claim of correlation between clusters and clinical outcome, made after clustering samples using a selection of outcome-related differentially expressed genes”. In the present study, all spots were used for clustering the volume of which was significantly changed by any of the assessed substances (which had carefully been selected by an expert committee to include representatives of all possible types and strengths of embryotoxic effects). On the other hand, the relevant “outcome” in this analysis is “membership in a class of substances with similar effects on protein abundances”. Obviously, these criteria for spot selection and outcome assignment are entirely unrelated to each other. In consequence, the selection of spots was not “outcome-related” as presupposed by the cited article and hence the article’s concerns do not apply. Had the outcome been related to toxic effects in general, the criticism might hold true. E.g., if the various effect vectors of toxicant treatments along with those of solute “treatments” had been used for clustering there is little doubt that in one of the principal clusters all toxicants and in another one all solutes (plus, maybe, some non-toxic substances) would have been grouped together.

*Supplementary Table1S: Mass spectrometric identifications of relevant proteins. The table shows all accepted proteins in all spots in which one of the proteins from Tables 1 or 3 was identified, along with pertinent information relating to the detection process: Mascot PMF score, expectation value, sequence coverage, number of matching and not matching masses in the respective Mascot identification, molecular mass and pI of the identified protein, interpolated molecular mass and pI of the analyzed spot in the gel. For spots with an asterisk in the last column, MS/MS sequence data were obtained for one or more peptides (see supplementary Table 2S).*

| spot # | Identified protein                                                      | Accession number | PMF score | Expectation | Sequence coverage | Matched masses | No matches | Molec. mass | pI  | Mol. mass on gel | pI on gel |
|--------|-------------------------------------------------------------------------|------------------|-----------|-------------|-------------------|----------------|------------|-------------|-----|------------------|-----------|
| 288    | Ran binding protein 5 [Mus musculus]                                    | gi 12057236      | 199       | 2.8E-15     | 24.9 %            | 21             | 15         | 128298      | 4.5 | 139000           | 4.        |
| 288    | RAN binding protein 5 [Mus musculus]                                    | gi 29789199      | 199       | 2.8E-15     | 25.0 %            | 21             | 15         | 128115      | 4.6 | 139000           | 4.        |
| 288    | RAN binding protein 5, isoform CRA_a [Mus musculus]                     | gi 148668272     | 187       | 4.4E-14     | 24.5 %            | 20             | 16         | 125104      | 4.8 | 139000           | 4.        |
| 288    | Ranbp5 protein [Mus musculus]                                           | gi 32451775      | 163       | 1.1E-11     | 24.2 %            | 18             | 18         | 121417      | 4.6 | 139000           | 4.        |
| 507    | Heat shock protein 8 [Mus musculus]                                     | gi 42542422      | 289       | 2.8E-24     | 45.2 %            | 28             | 30         | 71536       | 5   | 83000            | 5.5       |
| 507    | heat shock protein 9 [Mus musculus]                                     | gi 6754256       | 288       | 3.6E-24     | 48.2 %            | 30             | 25         | 74368       | 6   | 83000            | 5.5       |
| 507    | stress-70 protein (PBP74/CSA) [Mus musculus domesticus]                 | gi 903309        | 286       | 5.7E-24     | 48.2 %            | 30             | 25         | 74301       | 5.9 | 83000            | 5.5       |
| 507    | Hspa8 protein [Mus musculus]                                            | gi 63101351      | 255       | 7E-21       | 43.1 %            | 26             | 32         | 69444       | 5.4 | 83000            | 5.5       |
| 522    | Heat shock protein 8 [Mus musculus]                                     | gi 42542422      | 297       | 4.6E-25     | 48.5 %            | 32             | 29         | 71536       | 5   | 79500            | 5.3       |
| 523    | Heat shock protein 8 [Mus musculus]                                     | gi 42542422      | 303       | 1.1E-25     | 49.4 %            | 31             | 27         | 71536       | 5   | 80000            | 5.4       |
| 524    | Heat shock protein 8 [Mus musculus]                                     | gi 42542422      | 281       | 1.7E-23     | 45.7 %            | 29             | 18         | 71536       | 5   | 77500            | 5.        |
| 524    | Hspa8 protein [Mus musculus]                                            | gi 63101351      | 261       | 1.7E-21     | 44.2 %            | 28             | 19         | 69444       | 5.4 | 77500            | 5.        |
| 540    | ras-GTPase-activating protein SH3-domain binding protein [Mus musculus] | gi 7305075       | 248       | 3.5E-20     | 59.4 %            | 25             | 41         | 51974       | 5.3 | 71000            | 5.        |
| 540    | mKIAA4115 protein [Mus musculus]                                        | gi 60359872      | 233       | 1.1E-18     | 47.7 %            | 23             | 21         | 56298       | 6.4 | 71000            | 5.        |

|     |                                                                         |              |     |          |        |    |    |       |     |       |     |
|-----|-------------------------------------------------------------------------|--------------|-----|----------|--------|----|----|-------|-----|-------|-----|
| 541 | ras-GTPase-activating protein SH3-domain binding protein [Mus musculus] | gi 7305075   | 168 | 3.5E-12  | 46.7 % | 22 | 57 | 51974 | 5.3 | 77500 | 5.6 |
| 541 | mKIAA4115 protein [Mus musculus]                                        | gi 60359872  | 150 | 2.2E-10  | 40.6 % | 21 | 58 | 56298 | 6.4 | 77500 | 5.6 |
| 544 | calreticulin [Mus musculus]                                             | gi 6680836   | 142 | 1.4E-09  | 38.5 % | 11 | 13 | 48496 | 4.1 | 77000 | 4.  |
| 547 | dihydropyrimidinase-like 2 [Mus musculus]                               | gi 40254595  | 124 | 8.8E-08  | 30.1 % | 11 | 26 | 63478 | 6.3 | 80000 | 6.  |
| 547 | Ulip2 protein [Mus musculus]                                            | gi 1915913   | 107 | 4.4E-06  | 26.2 % | 10 | 27 | 63371 | 6.3 | 80000 | 6.  |
| 550 | ras-GTPase-activating protein SH3-domain binding protein [Mus musculus] | gi 7305075   | 241 | 1.7E-19  | 43.9 % | 22 | 29 | 51974 | 5.3 | 72000 | 5.  |
| 550 | mKIAA4115 protein [Mus musculus]                                        | gi 60359872  | 217 | 4.4E-17  | 38.0 % | 21 | 30 | 56298 | 6.4 | 72000 | 5.  |
| 558 | dihydropyrimidinase-like 2 [Mus musculus]                               | gi 40254595  | 90  | 0.00018  | 28.0 % | 9  | 19 | 63478 | 6.3 | 79000 | 6.  |
| 558 | Ulip2 protein [Mus musculus]                                            | gi 1915913   | 76  | 0.0054   | 24.1 % | 8  | 20 | 63371 | 6.3 | 79000 | 6.  |
| 573 | stress-induced phosphoprotein 1 [Mus musculus]                          | gi 14389431  | 95  | 0.000063 | 31.9 % | 14 | 43 | 64490 | 6.8 | 78000 | 6.  |
| 573 | Stress-induced phosphoprotein 1 [Mus musculus]                          | gi 13277819  | 93  | 0.000092 | 27.3 % | 13 | 25 | 64476 | 6.8 | 78000 | 6.  |
| 605 | stress-induced phosphoprotein 1 [Mus musculus]                          | gi 14389431  | 248 | 3.6E-20  | 46.6 % | 27 | 33 | 64490 | 6.8 | 73000 | 6.6 |
| 605 | Stress-induced phosphoprotein 1 [Mus musculus]                          | gi 13277819  | 232 | 1.4E-18  | 43.6 % | 26 | 34 | 64476 | 6.8 | 73000 | 6.6 |
| 624 | stress-induced phosphoprotein 1 [Mus musculus]                          | gi 14389431  | 195 | 7E-15    | 39.0 % | 19 | 16 | 64490 | 6.8 | 73000 | 6.  |
| 624 | Stress-induced phosphoprotein 1 [Mus musculus]                          | gi 13277819  | 179 | 2.8E-13  | 36.1 % | 18 | 17 | 64476 | 6.8 | 73000 | 6.  |
| 624 | stress-induced phosphoprotein 1 [Rattus norvegicus]                     | gi 20302113  | 149 | 2.8E-10  | 35.5 % | 16 | 19 | 64478 | 6.8 | 73000 | 6.  |
| 684 | calreticulin [Mus musculus]                                             | gi 6680836   | 114 | 9.1E-07  | 45.0 % | 15 | 71 | 48496 | 4.1 | 61000 | 4.  |
| 685 | calreticulin [Mus musculus]                                             | gi 6680836   | 138 | 3.5E-09  | 45.7 % | 15 | 51 | 48496 | 4.1 | 59000 | 4.4 |
| 715 | CCT (chaperonin containing TCP-1) beta subunit [Mus musculus]           | gi 468546    | 179 | 2.8E-13  | 44.1 % | 20 | 29 | 58474 | 6.4 | 60500 | 6.  |
| 715 | chaperonin subunit 2 (beta) [Mus musculus]                              | gi 126521835 | 179 | 2.8E-13  | 44.1 % | 20 | 29 | 58504 | 6.4 | 60500 | 6.  |
| 715 | chaperonin subunit 2 (beta), isoform CRA_b [Mus musculus]               | gi 148689878 | 85  | 0.0007   | 33.2 % | 9  | 24 | 45028 | 6.1 | 60500 | 6.  |
| 717 | Fscn1 protein [Mus musculus]                                            | gi 144719132 | 317 | 4.4E-27  | 63.2 % | 30 | 46 | 53597 | 6.6 | 60500 | 6.4 |
| 717 | Unknown (protein for IMAGE:3599038) [Mus musculus]                      | gi 116283253 | 316 | 5.5E-27  | 62.8 % | 30 | 46 | 53868 | 6.9 | 60500 | 6.4 |
| 717 | fascin homolog 1, actin bundling protein [Mus musculus]                 | gi 113680348 | 311 | 1.7E-26  | 59.6 % | 30 | 46 | 56776 | 6.9 | 60500 | 6.4 |

|      |                                                                                                                             |              |     |          |        |    |    |       |     |       |     |
|------|-----------------------------------------------------------------------------------------------------------------------------|--------------|-----|----------|--------|----|----|-------|-----|-------|-----|
| 717  | fascin [Mus musculus]                                                                                                       | gi 497775    | 195 | 7E-15    | 44.4 % | 20 | 33 | 56673 | 6.6 | 60500 | 6.4 |
| 737  | Fscn1 protein [Mus musculus]                                                                                                | gi 144719132 | 346 | 5.5E-30  | 55.1 % | 26 | 15 | 53597 | 6.6 | 56000 | 6.  |
| 737  | Unknown (protein for IMAGE:3599038) [Mus musculus]                                                                          | gi 116283253 | 345 | 7E-30    | 54.7 % | 26 | 15 | 53868 | 6.9 | 56000 | 6.  |
| 737  | fascin homolog 1, actin bundling protein [Mus musculus]                                                                     | gi 113680348 | 340 | 2.2E-29  | 51.9 % | 26 | 15 | 56776 | 6.9 | 56000 | 6.  |
| 738  | Unknown (protein for IMAGE:3599038) [Mus musculus]                                                                          | gi 116283253 | 104 | 8.8E-06  | 32.3 % | 12 | 68 | 53868 | 6.9 | 56000 | 6.  |
| 738  | Fscn1 protein [Mus musculus]                                                                                                | gi 144719132 | 104 | 8.8E-06  | 32.5 % | 12 | 68 | 53597 | 6.6 | 56000 | 6.  |
| 738  | fascin homolog 1, actin bundling protein [Mus musculus]                                                                     | gi 113680348 | 101 | 0.000017 | 30.6 % | 12 | 68 | 56776 | 6.9 | 56000 | 6.  |
| 739  | Heat shock protein 8 [Mus musculus]                                                                                         | gi 42542422  | 90  | 0.00018  | 25.9 % | 13 | 32 | 71536 | 5   | 56000 | 6.  |
| 749  | retinoblastoma binding protein 7 [Mus musculus]                                                                             | gi 123223058 | 110 | 2.2E-06  | 40.2 % | 11 | 31 | 44808 | 5.2 | 54000 | 4.  |
| 749  | retinoblastoma binding protein 7 [Mus musculus]                                                                             | gi 123223060 | 102 | 0.000014 | 35.1 % | 9  | 36 | 47941 | 4.9 | 54000 | 4.  |
| 753  | Heat shock protein 8 [Mus musculus]                                                                                         | gi 42542422  | 118 | 3.5E-07  | 24.9 % | 13 | 18 | 71536 | 5   | 56333 | 6.3 |
| 992  | PREDICTED: similar to Nucleophosmin (NPM) (Nucleolar phosphoprotein B23) (Numatrin) (Nucleolar protein NO38) [Mus musculus] | gi 149251776 | 132 | 1.4E-08  | 50.7 % | 14 | 49 | 33177 | 4.6 | 40000 | 4.  |
| 992  | nucleophosmin 1 [Mus musculus]                                                                                              | gi 6679108   | 115 | 7E-07    | 42.5 % | 13 | 50 | 33071 | 4.4 | 40000 | 4.  |
| 992  | Nucleophosmin 1 [Mus musculus]                                                                                              | gi 55153941  | 115 | 7E-07    | 42.5 % | 13 | 50 | 33099 | 4.4 | 40000 | 4.  |
| 992  | nucleophosmin 1 [Mus musculus]                                                                                              | gi 56206422  | 81  | 0.0015   | 38.3 % | 11 | 56 | 30037 | 4.2 | 40000 | 4.  |
| 993  | PREDICTED: similar to Nucleophosmin (NPM) (Nucleolar phosphoprotein B23) (Numatrin) (Nucleolar protein NO38) [Mus musculus] | gi 149251776 | 105 | 0.000007 | 46.9 % | 12 | 55 | 33177 | 4.6 | 39000 | 4.  |
| 993  | nucleophosmin 1 [Mus musculus]                                                                                              | gi 56206422  | 99  | 0.000028 | 34.5 % | 8  | 21 | 30037 | 4.2 | 39000 | 4.  |
| 993  | nucleophosmin 1 [Mus musculus]                                                                                              | gi 6679108   | 96  | 0.000045 | 31.2 % | 8  | 21 | 33071 | 4.4 | 39000 | 4.  |
| 993  | Nucleophosmin 1 [Mus musculus]                                                                                              | gi 55153941  | 96  | 0.000045 | 31.2 % | 8  | 21 | 33099 | 4.4 | 39000 | 4.  |
| 1314 | Rho GDP dissociation inhibitor (GDI) alpha [Mus musculus]                                                                   | gi 13435747  | 128 | 3.5E-08  | 41.7 % | 8  | 33 | 23554 | 4.8 | 28500 | 5.0 |
| 1314 | Rho GDP dissociation inhibitor (GDI) alpha [Mus musculus]                                                                   | gi 31982030  | 128 | 3.5E-08  | 45.6 % | 9  | 32 | 23570 | 4.8 | 28500 | 5.0 |
| 1330 | Rho GDP dissociation inhibitor (GDI) alpha [Mus musculus]                                                                   | gi 13435747  | 86  | 0.00046  | 38.7 % | 9  | 29 | 23554 | 4.8 | 28000 | 5.  |

|      |                                                                                                                      |             |     |         |        |   |    |       |     |       |    |
|------|----------------------------------------------------------------------------------------------------------------------|-------------|-----|---------|--------|---|----|-------|-----|-------|----|
| 1330 | Rho GDP dissociation inhibitor (GDI) alpha [Mus musculus]                                                            | gi 31982030 | 86  | 0.00046 | 38.7 % | 9 | 29 | 23570 | 4.8 | 28000 | 5. |
| 1424 | Heat shock protein beta-1 (HspB1) (Heat shock 27 kDa protein) (HSP 27) (Growth-related 25 kDa protein) (P25) (HSP25) | gi 547679   | 110 | 2.2E-06 | 49.3 % | 8 | 24 | 23177 | 6.5 | 26000 | 6. |
| 1424 | heat shock protein 1 [Mus musculus]                                                                                  | gi 7305173  | 93  | 0.00009 | 45.7 % | 7 | 25 | 23064 | 7   | 26000 | 6. |

*Supplementary Table2S: MS/MS sequence identifications of individual peptides from the proteins of Table 1S marked by an asterisk in the rightmost column. The table shows the peptide sequences along with pertinent information relating to the detection process: precursor mass, ion charge z, Mascot ion score, expectation value, MS/MS technique (MALDI postsource decay PSD or QTOF collision induced dissociation CID. Note the insignificant expectation value for spot 540 “Phosphor” which is only meant as an additional confirmation of the phosphorylation shown for spot 541.*

| spot # | Precursor mass | z | Ion score | Expectation | Sequence                                                         | PSD or CID |
|--------|----------------|---|-----------|-------------|------------------------------------------------------------------|------------|
| 507    | 833.413        | 2 | 83        | 2.70E-06    | <sup>57</sup> NQVAMNPTNTVFDAK <sup>71</sup> +Oxidation (M)       | CID        |
| 522    | 596.676        | 3 | 92        | 9.40E-08    | <sup>172</sup> IINEPTAAAIAYGLDKK <sup>188</sup>                  | CID        |
| 523    | 744.369        | 2 | 86        | 1.30E-06    | <sup>37</sup> TTPSYVAFTDTER <sup>49</sup>                        | CID        |
| 524    | 600.350        | 2 | 52        | 0.0026      | <sup>160</sup> DAGTIAGLNVLR <sup>171</sup>                       | CID        |
| 540    | 902.914        | 2 | 27        | 1.5         | <sup>229</sup> STSPAPADVAPAQEDLR <sup>245</sup> +(Phosphor )     | CID        |
| 540    | 862,927        | 2 | 48        | 0.014       | <sup>229</sup> STSPAPADVAPAQEDLR <sup>245</sup>                  | CID        |
| 540    | 578.270        | 2 | 58        | 0.00053     | <sup>319</sup> EAGEPGDVEPR <sup>329</sup>                        | CID        |
| 541    | 902.914        | 2 | 43        | 0.0016      | <sup>229</sup> STSPAPADVAPAQEDLR <sup>245</sup> +(Phosphor)      | CID        |
| 550    | 578.280        | 2 | 58        | 0.00073     | <sup>319</sup> EAGEPGDVEPR <sup>329</sup>                        | CID        |
| 605    | 558.834        | 2 | 65        | 7.30E-05    | <sup>534</sup> LMDVGLIAIR <sup>543</sup>                         | CID        |
| 685    | 2976.468       | 1 | 100       | 4.60E-08    | <sup>163</sup> CKDDEFTHLYTLIVRPDNTYEVK <sup>185</sup> +BHPECAM © | PSD        |
| 704    | 665.839        | 2 | 79        | 7.90E-06    | <sup>377</sup> GATQQILDEAER <sup>388</sup>                       | CID        |
| 715    | 654.338        | 2 | 80        | 5.20E-06    | <sup>237</sup> ILIA NTGMDTDK <sup>248</sup> +Oxidation (M)       | CID        |
| 717    | 537.810        | 2 | 73        | 2.20E-05    | <sup>399</sup> KVTGTL DANR <sup>408</sup>                        | CID        |
| 737    | 564.796        | 2 | 90        | 5.30E-07    | <sup>91</sup> FLVVAHDDGR <sup>100</sup>                          | CID        |
| 749    | 1909.894       | 1 | 73        | 5.70E-05    | <sup>147</sup> HPAKPDPSGECNPDLR <sup>162</sup> +BHPECAM ©        | PSD        |
| 992    | 784.882        | 2 | 111       | 4.20E-09    | <sup>33</sup> VDNDENEHQLSLR <sup>45</sup>                        | CID        |
| 992    | 565.816        | 2 | 65        | 0.0002      | <sup>238</sup> GPSSVEDIKAK <sup>248</sup>                        | CID        |
| 993    | 565.817        | 2 | 48        | 0.0097      | <sup>238</sup> GPSSVEDIKAK <sup>248</sup>                        | CID        |
| 1314   | 1650.909       | 1 | 83        | 2.80E-06    | <sup>59</sup> VAVSADPNVPNVIVTR <sup>74</sup>                     | PSD        |
| 1424   | 538.293        | 2 | 67        | 0.00013     | <sup>84</sup> QLSSGVSEIR <sup>93</sup>                           | CID        |
